# Supplementary material
Source: PubMed Central journal article supplement (PMC2667058)
Supplement: 0812715106_0812715106SI.pdf [file 0812715106_0812715106SI.pdf]

# Supporting Information

10.1073/pnas.0812715106

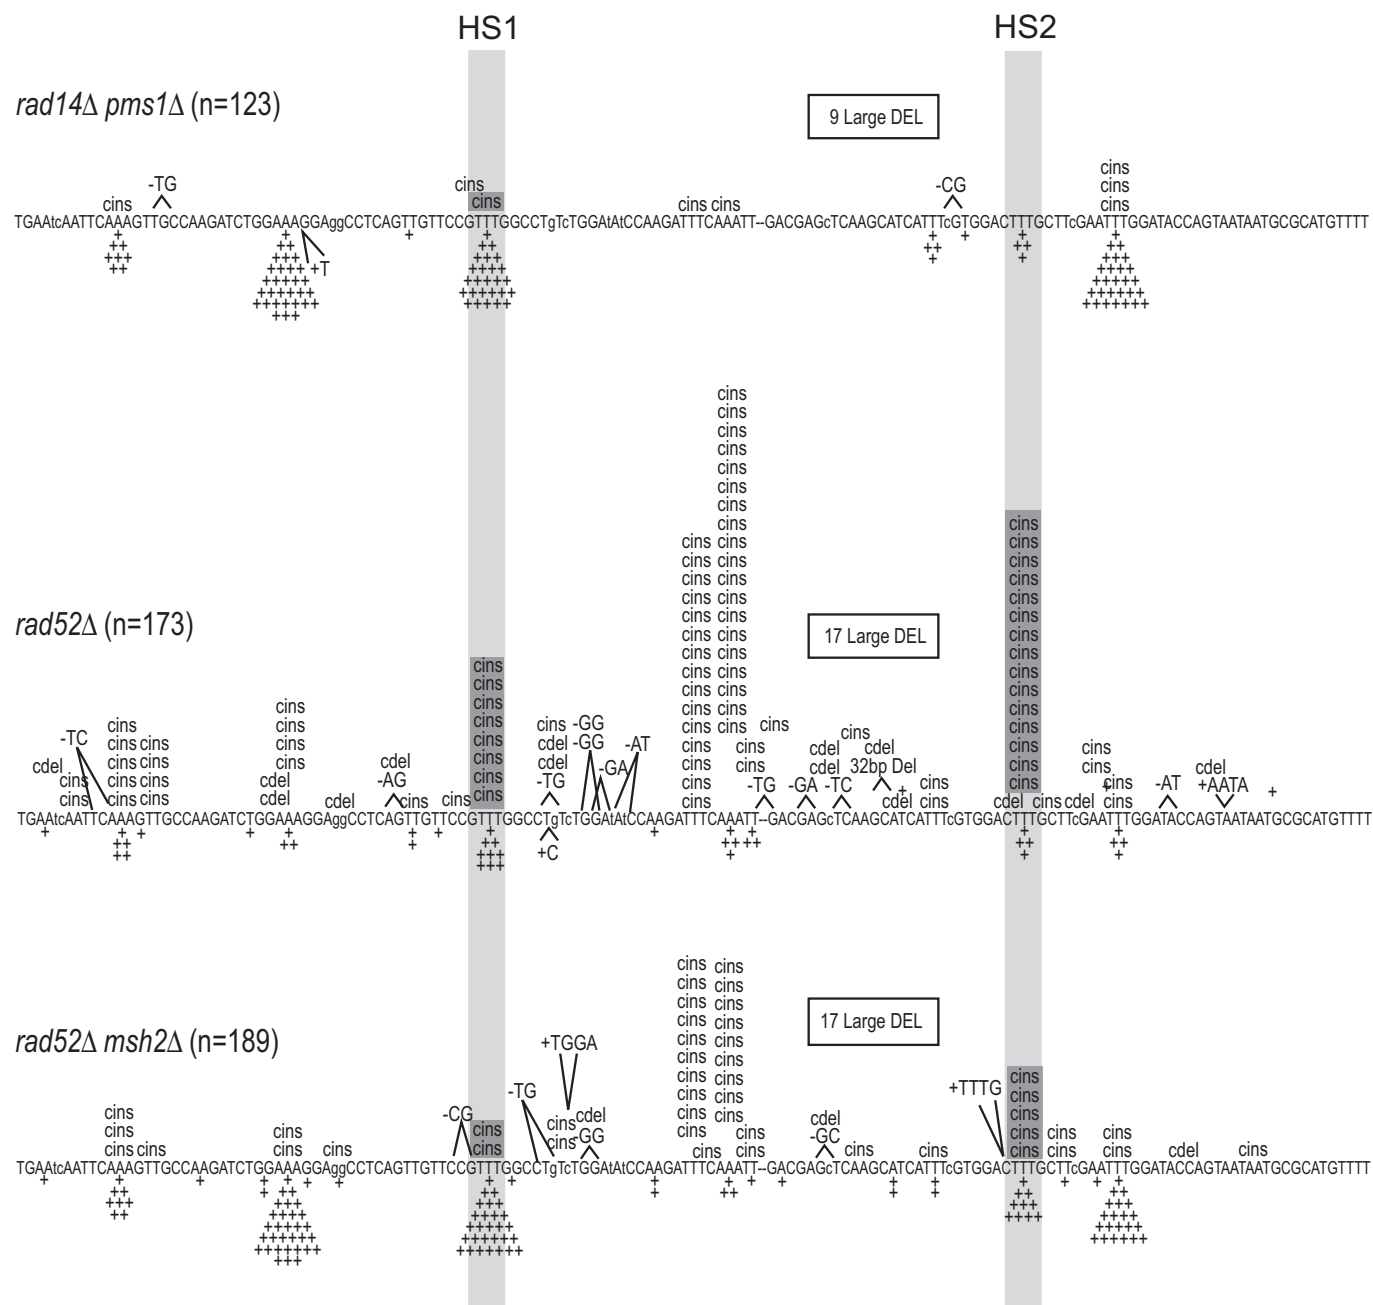

**Fig. S1.** *lvs2ΔA746-NR* reversion spectra in repair-defective backgrounds. The sequence of the  $\approx 150$ -bp reversion window is shown. The site of the 1-nt deletion that defines the allele is indicated by a dash and additional changes from the WT sequence are in lowercase. Simple insertions are indicated by “+” below the sequence and other mutation types are indicated above the sequence. The positions of HS1 and HS2 are indicated by light gray shading; complex insertions (“cins”) at these positions are shaded dark gray. “Large DEL” refers to 95-nt deletions with endpoints in 10-nt direct repeats; “cdel” corresponds to  $-2$  events associated with nearby base substitutions. The number (“n”) of independent revertants sequenced from each background is indicated.

**Table S1. Yeast strains**

| Strain  | Relevant repair genotype                             | Construction                                                                                                           |
|---------|------------------------------------------------------|------------------------------------------------------------------------------------------------------------------------|
| SJR1472 | <i>msh2Δ::hisG-URA3-hisG</i>                         | OST of SJR1467 with AatII/XbaI–digested GC1914 (1)                                                                     |
| SJR2645 | <i>rad14Δ::kan</i>                                   | OST of SJR1467 with PCR fragment amplified from pFA6a–kanMX6 (2)                                                       |
| SJR2672 | <i>rad14Δ::kan msh2Δ::hisG-URA3-hisG</i>             | OST of SJR2645 with AatII/XbaI–digested GC1914 (1)                                                                     |
| SJR2733 | <i>rad52Δ::kan</i>                                   | OST of SJR1467 with PCR fragment amplified from pFA6a–kanMX6 (2)                                                       |
| SJR2734 | <i>msh2Δ::hisG-URA3-hisG rad52Δ::kan</i>             | OST of SJR1472 with PCR fragment amplified from pFA6a–kanMX6 (2)                                                       |
| SJR2773 | <i>rad14Δ::kan pms1Δ::hyg</i>                        | OST of SJR2645 with PCR fragment amplified from hphMX4 (3)                                                             |
| SJR2778 | <i>rad14Δ::kan rad52Δ::hyg</i>                       | OST of SJR2645 with PCR fragment amplified from hphMX4 (3)                                                             |
| SJR2779 | <i>rad14Δ::kan msh2Δ::hisG-URA3-hisG rad52Δ::hyg</i> | OST of SJR2672 with PCR fragment amplified from hphMX4 (3)                                                             |
| SJR2808 | <i>rad14Δ::kan pms1-G128A,I854M</i>                  | Sequential TST of SJR2645 with pSR760 [ <i>pms1-I854M</i> allele (4)] and pYI–pms1–128 [ <i>pms1-G128A</i> allele (5)] |

OST, 1-step allele transplacement; TST, 2-step allele transplacement. All strains were derived from SJR1467 (*MAT $\alpha$  ade2-101<sub>oc</sub> his3 $\Delta$  200 ura3 $\Delta$  Nco lys2 $\Delta$  A746-NR*) by transformation.

- Greene CN, Jinks-Robertson S (1997) Frameshift intermediates in homopolymer runs are removed efficiently by yeast mismatch repair proteins. *Mol Cell Biol* 17:2844–2850.
- Longtine MS, et al. (1998) Additional modules for versatile and economical PCR–based gene deletion and modification in *Saccharomyces cerevisiae*. *Yeast* 14:953–961.
- Goldstein AL, McCusker JH (1999) Three new dominant drug resistance cassettes for gene disruption in *Saccharomyces cerevisiae*. *Yeast* 15:1541–1553.
- Welz-Voegele C, et al. (2002) Alleles of the yeast *PMS1* mismatch-repair gene that differentially affect recombination- and replication-related processes. *Genetics* 162:1131–1145.
- Tran PT, Liskay M (2000) Functional studies on the candidate ATPase domains of *Saccharomyces cerevisiae* MutL $\alpha$ . *Mol Cell Biol* 20:6390–6398.

**Table S2. Distributions of hotspot 1 complex events in different strain backgrounds**

| Hotspot 1 position |   | Number of events |   |   |   |   |   |    |              |               |                     |                      |                            |                     | Total                     |               |                     |       |
|--------------------|---|------------------|---|---|---|---|---|----|--------------|---------------|---------------------|----------------------|----------------------------|---------------------|---------------------------|---------------|---------------------|-------|
| C                  | C | T                | T | T | G | G | C | WT | <i>msh2Δ</i> | <i>rad14Δ</i> | <i>rad14Δ msh2Δ</i> | <i>rad14Δ rad52Δ</i> | <i>rad14Δ rad52Δ msh2Δ</i> | <i>rad14Δ pms1Δ</i> | <i>rad14Δ pms1Δ msh2Δ</i> | <i>rad52Δ</i> | <i>rad52Δ msh2Δ</i> | Total |
| -                  | - | +                | - | - | - | T | - | 2  | 11           | 3             | 3                   | 1                    | 1                          | 1                   | 1                         | 1             | 1                   | 21    |
| -                  | - | +                | - | - | - | T | - | 1  | 8            | 2             | 1                   | 1                    | 1                          | 1                   | 1                         | 1             | 1                   | 14    |
| -                  | - | +                | - | - | - | - | 1 |    |              |               |                     |                      |                            | 1                   |                           | 2             | 1                   | 6     |
| -                  | - | +                | - | - | - | T | - |    |              | 2             | 1                   | 1                    | 1                          | 1                   | 1                         |               | 1                   | 5     |
| -                  | - | +                | - | - | - | - | A |    | 3            | 1             |                     |                      |                            |                     |                           |               |                     | 4     |
| -                  | - | +                | - | - | - | T | - | 1  | 1            | 1             | 1                   | 1                    | 1                          | 1                   | 1                         | 1             | 1                   | 3     |
| T                  | - | +                | - | - | - | - | - |    |              | 2             | 1                   |                      |                            |                     |                           |               |                     | 2     |
| -                  | - | +                | - | - | - | A | - |    |              | 2             |                     |                      |                            |                     |                           |               |                     | 2     |
| -                  | - | +                | - | - | - | T | T |    |              | 2             |                     |                      |                            |                     |                           |               |                     | 3     |
| -                  | - | +                | - | - | - | - | C |    | 1            | 1             |                     |                      |                            | 1                   |                           |               |                     | 1     |
| T                  | G | +                | - | - | - | - | - | 1  |              | 1             |                     |                      |                            |                     |                           |               |                     | 1     |
| -                  | - | +                | - | - | - | - | - |    |              | 1             |                     |                      |                            |                     |                           | 1             |                     | 1     |
| *                  | - | +                | - | - | - | - | - |    |              | 1             |                     |                      |                            |                     |                           |               |                     | 1     |
| -                  | - | +                | - | - | - | - | - |    |              |               |                     |                      |                            |                     |                           |               |                     | 1     |
| -                  | - | +                | - | - | - | - | - |    |              |               |                     |                      |                            |                     |                           |               |                     | 1     |
| -                  | A | +                | - | - | - | - | - |    |              |               |                     |                      |                            |                     |                           |               |                     | 1     |
| -                  | - | +                | - | - | - | - | - |    |              |               |                     |                      |                            |                     |                           |               |                     | 1     |
| -                  | - | +                | - | - | - | - | A | T  |              |               |                     |                      |                            |                     |                           |               |                     | 1     |
| T                  | - | +                | - | - | - | - | - | G  |              |               |                     |                      |                            | 1                   |                           |               |                     | 1     |
| -                  | - | +                | - | - | - | T | A | -  |              |               |                     |                      |                            |                     |                           | 1             |                     | 1     |
| -                  | - | +                | - | - | - | T | - | G  |              |               |                     |                      |                            |                     |                           | 1             |                     | 1     |
| Total              |   |                  |   |   |   |   |   | 3  | 24           | 0             | 0                   | 15                   | 11                         | 1                   | 6                         | 8             | 2                   | 70    |

The 3T run where the selected frameshift occurs is italicized and bold; the G where base substitutions most frequently occur is bold and underlined. A base substitution outside of the core hotspot sequence is indicated by an asterisk. *pms1-GA,IM=pms1-GT28A,1854M*.

**Table S3. Distributions of hotspot 2 complex events in different strain backgrounds**

| Hotspot 2 position |   | Number of events |   |   |   |   |   |   |    |       |        |        |        | Total  |        |        |       |        |       |        |            |        |       |       |    |
|--------------------|---|------------------|---|---|---|---|---|---|----|-------|--------|--------|--------|--------|--------|--------|-------|--------|-------|--------|------------|--------|-------|-------|----|
| G                  | A | C                | T | T | T | G | C | T | WT | msh2Δ | rad14Δ | rad52Δ | rad14Δ | rad52Δ | rad14Δ | rad52Δ | msh2Δ | rad14Δ | pms1Δ | rad14Δ | pms1-GA,IM | rad52Δ | msh2Δ | Total |    |
| -                  | - | -                | - | + | T | - | - | - | 1  |       | 7      |        | 11     |        | 5      |        |       |        | 1     |        | 9          |        | 3     |       | 37 |
| -                  | - | T                | - | + | T | - | - | - | 2  |       | 2      |        | 3      |        | 1      |        |       |        | 1     |        | 1          |        |       |       | 7  |
| -                  | - | -                | - | + | - | T | - | - |    |       | 2      |        | 1      |        | 1      |        |       |        | 1     |        | 1          |        |       |       | 4  |
| -                  | - | -                | - | + | A | - | - | - | 2  |       | 2      |        |        |        |        |        |       |        |       |        |            |        | 1     |       | 3  |
| -                  | - | G                | T | + | A | - | - | - | 1  |       | 1      |        |        |        |        |        |       |        | 1     |        |            |        |       |       | 2  |
| -                  | - | -                | - | + | C | - | - | - |    |       |        |        | 1      |        |        |        |       |        |       |        | 1          |        |       |       | 2  |
| -                  | - | -                | T | + | - | - | - | - |    |       |        |        |        |        | 1      |        |       |        |       |        |            |        | 1     |       | 2  |
| -                  | - | A                | - | + | T | - | - | - | 1  |       | 1      |        |        |        |        |        |       |        |       |        | 1          |        |       |       | 2  |
| *                  | - | A                | + | + | T | - | - | - |    |       |        |        |        |        |        |        |       |        |       |        |            |        |       |       | 1  |
| *                  | - | A                | + | + | - | - | - | - |    |       |        |        | 1      |        |        |        |       |        |       |        |            |        |       |       | 1  |
| -                  | - | G                | T | + | - | - | - | - |    |       |        |        |        |        |        |        |       |        |       |        |            |        |       |       | 1  |
| -                  | - | -                | - | + | T | A | - | - |    |       |        |        | 1      |        |        |        |       |        |       |        |            |        |       |       | 1  |
| *                  | - | G                | T | + | A | A | - | - |    |       |        |        | 1      |        |        |        |       |        |       |        |            |        |       |       | 1  |
| *                  | - | -                | A | + | T | - | C | - |    |       |        |        | 1      |        |        |        |       |        |       |        |            |        |       |       | 1  |
| -                  | - | G                | - | + | T | - | - | - |    |       |        |        | 1      |        |        |        |       |        |       |        |            |        |       |       | 1  |
| -                  | - | -                | A | + | + | T | - | - |    |       |        |        | 1      |        |        |        |       |        |       |        |            |        |       |       | 1  |
| -                  | - | -                | - | + | + | T | T | - |    |       |        |        |        |        | 1      |        |       |        |       |        |            |        |       |       | 1  |
| -                  | - | T                | T | + | - | - | - | - |    |       |        |        |        |        | 1      |        |       |        |       |        |            |        |       |       | 1  |
| -                  | - | G                | T | + | T | - | - | - |    |       |        |        |        |        | 1      |        |       |        |       |        |            | 1      |       |       | 1  |
| -                  | - | -                | - | + | T | - | C | - |    |       |        |        |        |        |        |        |       |        |       |        |            |        |       |       | 1  |
| Total              |   |                  |   |   |   |   |   |   | 1  | 0     | 13     |        | 24     |        | 10     |        |       |        | 0     | 3      |            | 15     |       | 5     | 72 |

The 3T run where the selected frameshift occurs is italicized and bold; the G where base substitutions most frequently occur is bold and underlined. A base substitution outside the core hotspot sequence is indicated by an asterisk.
